# Supplementary material
Source: Springer Nature journal article supplement (https://www.springermedizin.de/resource/supplementary/12879_2012_3034_MOESM6_ESM.pdf/9446510)

Break Even Scatterplot of TWC-llc vs. TWC-Q-Syte

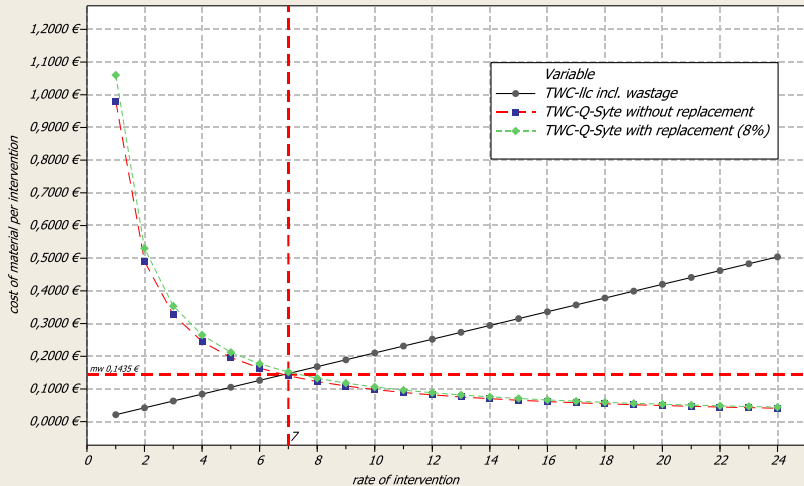

Supplement: MOESM6 [file 9446510]
